# Supplementary material for: Developing a Nomogram for Prioritizing Hysteroscopy in Endometrial Cancer Diagnosis: A Case-Control Study
Source: MDPI journal article supplement (doi:10.3390/jcm13041145), 2024-02-18
Supplement: s1 [file s1]

**Supplementary Table S1.** Scoring tables to obtain endometrial cancer and precursor lesion risk (Supplement)

| Hypertension            | Score | Age | Score | Endometrial thickness | Score | Total | Endometrial cancer and precursor lesion risk |
|-------------------------|-------|-----|-------|-----------------------|-------|-------|----------------------------------------------|
| Yes                     | 6     | 18  | 0     | 1                     | 0     | 70    | 0,05                                         |
| No                      | 0     | 20  | 2     | 2                     | 1     | 88    | 0,10                                         |
|                         |       | 22  | 4     | 3                     | 2     | 109   | 0,20                                         |
| Diabetes                | Score | 24  | 5     | 4                     | 3     | 122   | 0,30                                         |
| Yes                     | 17    | 26  | 7     | 5                     | 4     | 133   | 0,40                                         |
| No                      | 0     | 28  | 9     | 6                     | 5     | 143   | 0,50                                         |
|                         |       | 30  | 11    | 7                     | 6     | 153   | 0,60                                         |
| Postmenopausal bleeding | Score | 32  | 12    | 8                     | 7     | 164   | 0,70                                         |
| Yes                     | 20    | 34  | 14    | 9                     | 7     | 177   | 0,80                                         |
| No                      | 0     | 36  | 16    | 10                    | 8     | 197   | 0,90                                         |
|                         |       | 38  | 18    | 11                    | 9     | 216   | 0,95                                         |
| Uterus volume           | Score | 40  | 19    | 12                    | 10    |       |                                              |
| 20                      | 0     | 42  | 21    | 13                    | 11    |       |                                              |
| 120                     | 7     | 44  | 23    | 14                    | 12    |       |                                              |
| 220                     | 13    | 46  | 25    | 15                    | 13    |       |                                              |
| 320                     | 20    | 48  | 26    | 16                    | 14    |       |                                              |
| 420                     | 27    | 50  | 28    | 17                    | 15    |       |                                              |

|           |       |     |       |    |    |
|-----------|-------|-----|-------|----|----|
| 520       | 33    | 52  | 30    | 18 | 16 |
| 620       | 40    | 54  | 32    | 19 | 17 |
| 720       | 47    | 56  | 33    | 20 | 18 |
| 820       | 53    | 58  | 35    | 21 | 19 |
| 920       | 60    | 60  | 37    | 22 | 20 |
| 1020      | 67    | 62  | 39    | 23 | 21 |
| 1120      | 73    | 64  | 41    | 24 | 21 |
| 1220      | 80    | 66  | 42    | 25 | 22 |
| 1320      | 87    | 68  | 44    | 26 | 23 |
| 1420      | 93    | 70  | 46    | 27 | 24 |
| 1520      | 100   | 72  | 48    | 28 | 25 |
|           |       | 74  | 49    | 29 | 26 |
| Pregnancy | Score | 76  | 51    | 30 | 27 |
| 0         | 61    | 78  | 53    | 31 | 28 |
| 2         | 54    | 80  | 55    | 32 | 29 |
| 4         | 48    | 82  | 56    | 33 | 30 |
| 6         | 41    | 84  | 58    | 34 | 31 |
| 8         | 34    | 86  | 60    | 35 | 32 |
| 10        | 27    | 88  | 62    | 36 | 33 |
| 12        | 20    | 90  | 63    | 37 | 34 |
| 14        | 14    |     |       | 38 | 35 |
| 16        | 7     | BMI | Score | 39 | 35 |

|        |       |       |    |       |    |
|--------|-------|-------|----|-------|----|
| 18     | 0     | 16    | 0  | 40    | 36 |
| <hr/>  |       | 21    | 4  | 41    | 37 |
|        |       | 26    | 9  | 42    | 38 |
| Polyps | Score | 31    | 13 | 43    | 39 |
| Yes    | 8     | 36    | 17 | 44    | 40 |
| No     | 0     | 41    | 22 | 45    | 41 |
| <hr/>  |       | 46    | 26 | 46    | 42 |
|        |       | 51    | 31 | 47    | 43 |
|        |       | 56    | 35 | <hr/> |    |
|        |       | <hr/> |    |       |    |
